# Supplementary material for: Simple and noninvasive method for assessment of digestive efficiency: Validation of fecal steatocrit in greenfinch coccidiosis model
Source: PubMed Central journal article supplement (PMC5192951; doi:10.1002/ece3.2575), 2016-11-17

Electronic supplementary material ESM1. Distributions of individual steatocrit values.

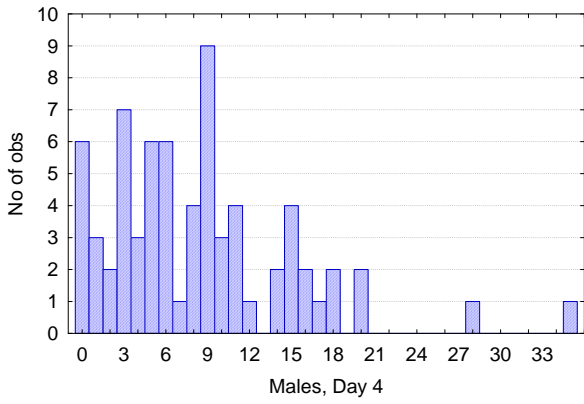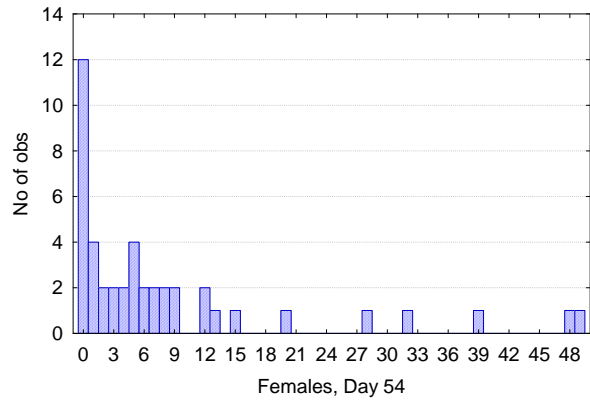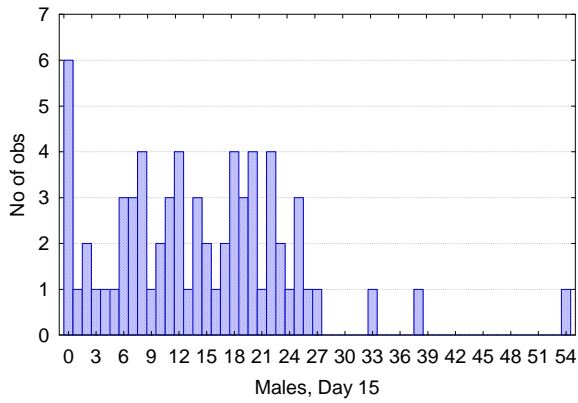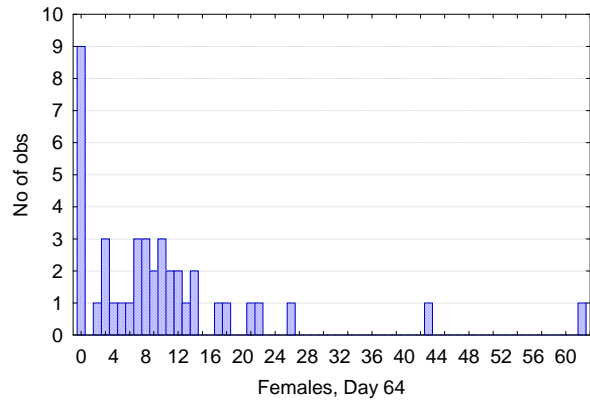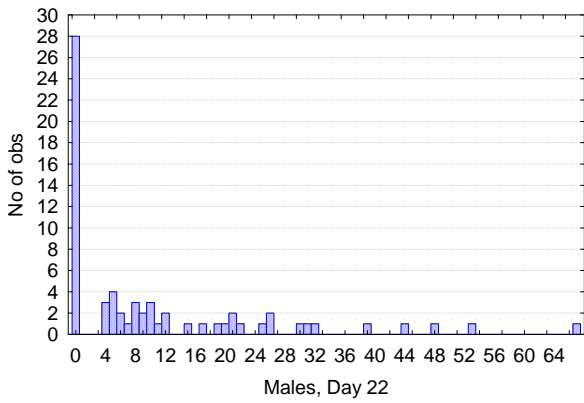

Supplement: ECE3-6-8756-s001.pdf [file ECE3-6-8756-s001.pdf]
